# Supplementary material for: Interaction of Arginine-Rich Cell-Penetrating Peptides with an Artificial Neuronal Membrane
Source: MDPI journal article supplement (doi:10.3390/cells11101638), 2022-05-13
Supplement: s1 [file s1]

Supplementary Materials

**Table S1.** Composition of the bilayer systems.

| Model      | Lipid types |         | Ion types       |                 | Peptide | Water  | Initial system size [x,y,z; Å] | Simulation time [μs] |
|------------|-------------|---------|-----------------|-----------------|---------|--------|--------------------------------|----------------------|
|            | Outer       | Inner   | Na <sup>+</sup> | Cl <sup>-</sup> |         |        |                                |                      |
| No peptide | 76 POPC     | 76 POPC | 284             | 248             | -       | 22112  | 117,117,200                    | 5                    |
|            | 48 POPE     | 48 POPE |                 |                 |         |        |                                |                      |
|            | 10 POPS     | 10 POPS |                 |                 |         |        |                                |                      |
|            | 40 CHOL     | 40 CHOL |                 |                 |         |        |                                |                      |
|            | 18 DPSM     | 18 DPSM |                 |                 |         |        |                                |                      |
|            | 8 DPG1      | 8 DPG1  |                 |                 |         |        |                                |                      |
| TAT_1      | 76 POPC     | 76 POPC | 213             | 186             | 1       | 16254  | 117,117,150                    | 10                   |
|            | 48 POPE     | 48 POPE |                 |                 |         |        |                                |                      |
|            | 10 POPS     | 10 POPS |                 |                 |         |        |                                |                      |
|            | 40 CHOL     | 40 CHOL |                 |                 |         |        |                                |                      |
|            | 18 DPSM     | 18 DPSM |                 |                 |         |        |                                |                      |
|            | 8 DPG1      | 8 DPG1  |                 |                 |         |        |                                |                      |
| TAT_15     | 76 POPC     | 76 POPC | 248             | 302             | 10      | 21935  | 117,117,200                    | 1                    |
|            | 48 POPE     | 48 POPE |                 | 347*            | 15*     | 21853* |                                | 9                    |
|            | 10 POPS     | 10 POPS |                 |                 |         |        |                                |                      |
|            | 40 CHOL     | 40 CHOL |                 |                 |         |        |                                |                      |
|            | 18 DPSM     | 18 DPSM |                 |                 |         |        |                                |                      |
|            | 8 DPG1      | 8 DPG1  |                 |                 |         |        |                                |                      |
| PTD4_1     | 76 POPC     | 76 POPC | 218             | 186             | 1       | 16301  | 117,117,150                    | 10                   |
|            | 48 POPE     | 48 POPE |                 |                 |         |        |                                |                      |
|            | 10 POPS     | 10 POPS |                 |                 |         |        |                                |                      |
|            | 40 CHOL     | 40 CHOL |                 |                 |         |        |                                |                      |
|            | 18 DPSM     | 18 DPSM |                 |                 |         |        |                                |                      |
|            | 8 DPG1      | 8 DPG1  |                 |                 |         |        |                                |                      |
| PTD4_15    | 76 POPC     | 76 POPC | 248             | 252             | 10      | 22002  | 117,117,200                    | 1                    |
|            | 48 POPE     | 48 POPE |                 | 272*            | 15*     | 21949* |                                | 9                    |
|            | 10 POPS     | 10 POPS |                 |                 |         |        |                                |                      |
|            | 40 CHOL     | 40 CHOL |                 |                 |         |        |                                |                      |
|            | 18 DPSM     | 18 DPSM |                 |                 |         |        |                                |                      |
|            | 8 DPG1      | 8 DPG1  |                 |                 |         |        |                                |                      |

\* Number of peptide molecules, chloride ion and water molecules after adding additional five peptide molecules to the system after 1 μs of the CG MD simulation. The CG MD simulations were then continued for another 9 μs.

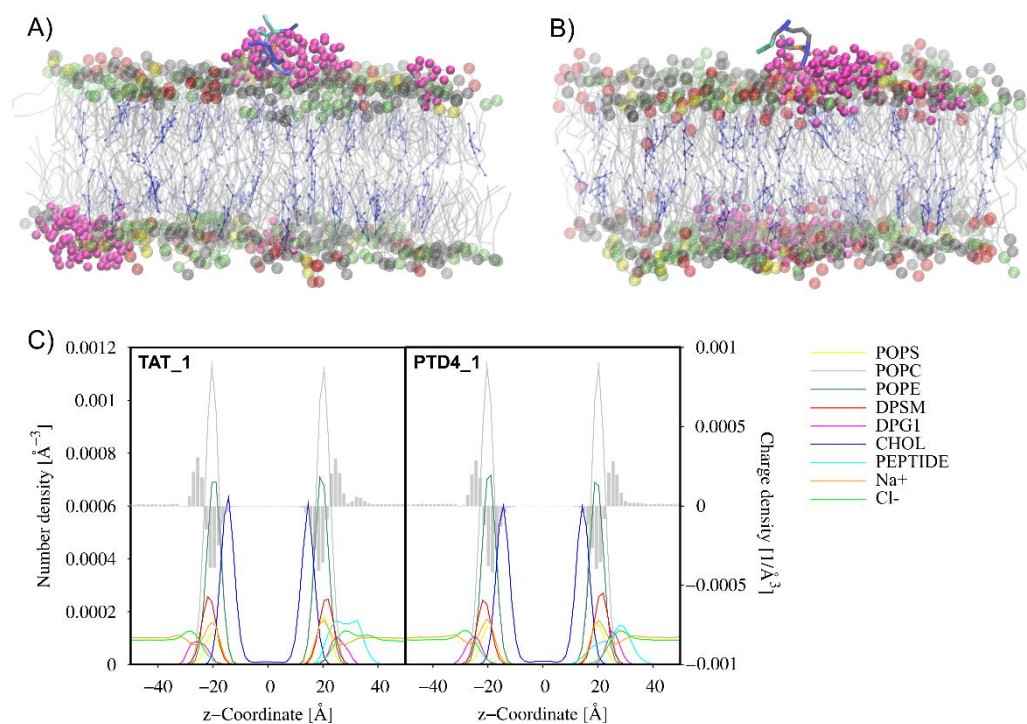

**Figure S1.** The final snapshots from the POPC:POPE:POPS:DPSM:CHOL binding CG MD simulations for systems with a single molecule of Tat(49-57)-NH<sub>2</sub> (A) and PTD4 (B). The headgroups of POPC, POPE, POPS and DPSM are colored gray, lime, yellow and red, respectively. The sugar part of DPSM is in magenta, while lipid acyl chains are presented in grey. CHOL is presented in blue as CPK model. (C) Partial density and charge density profiles averaged over the last 1  $\mu$ s of MD CG simulations of the systems with a single peptide molecule.
